# Supplementary material for: Viral and host factors associated with SARS-CoV-2 disease severity in Georgia, USA
Source: PubMed Central journal article supplement (PMC10635197; doi:10.1101/2023.10.25.23297530), 2023-10-25
Supplement: NIHPP2023.10.25.23297530v1-supplement-1.pdf [file NIHPP2023.10.25.23297530v1-supplement-1.pdf]

585 SUPPLEMENTARY TABLES

**Table S1. Extended COVID Symptoms and Underlying Conditions by Vaccination Status**

| <b>Variable</b>                             | <b>Overall,<br/>N = 1,957<sup>1</sup></b> | <b>Unvaccinated, N<br/>= 1,024<sup>1</sup></b> | <b>Vaccinated, N =<br/>933<sup>1</sup></b> | <b>p<sup>2</sup></b> |
|---------------------------------------------|-------------------------------------------|------------------------------------------------|--------------------------------------------|----------------------|
| <b>COVID Symptoms</b>                       |                                           |                                                |                                            |                      |
| Fever                                       | 720 (47%)                                 | 430 (52%)                                      | 290 (42%)                                  | <0.001               |
| (Missing)                                   | 435                                       | 197                                            | 238                                        |                      |
| Chills                                      | 537 (35%)                                 | 314 (38%)                                      | 223 (32%)                                  | 0.02                 |
| (Missing)                                   | 435                                       | 198                                            | 237                                        |                      |
| Rigors                                      | 29 (2.0%)                                 | 17 (2.1%)                                      | 12 (1.8%)                                  | 0.67                 |
| (Missing)                                   | 491                                       | 221                                            | 270                                        |                      |
| Myalgia                                     | 501 (34%)                                 | 279 (35%)                                      | 222 (33%)                                  | 0.59                 |
| (Missing)                                   | 484                                       | 218                                            | 266                                        |                      |
| Headache                                    | 521 (35%)                                 | 299 (37%)                                      | 222 (33%)                                  | 0.12                 |
| (Missing)                                   | 476                                       | 215                                            | 261                                        |                      |
| Sore Throat                                 | 286 (20%)                                 | 138 (17%)                                      | 148 (22%)                                  | 0.02                 |
| (Missing)                                   | 496                                       | 228                                            | 268                                        |                      |
| Nausea / Vomiting                           | 451 (30%)                                 | 282 (35%)                                      | 169 (25%)                                  | <0.001               |
| (Missing)                                   | 455                                       | 209                                            | 246                                        |                      |
| Diarrhea                                    | 369 (25%)                                 | 212 (26%)                                      | 157 (23%)                                  | 0.13                 |
| (Missing)                                   | 470                                       | 220                                            | 250                                        |                      |
| Fatigue                                     | 630 (41%)                                 | 337 (41%)                                      | 293 (41%)                                  | 0.81                 |
| (Missing)                                   | 418                                       | 195                                            | 223                                        |                      |
| Runny Nose or Nasal Congestion              | 519 (35%)                                 | 217 (27%)                                      | 302 (45%)                                  | <0.001               |
| (Missing)                                   | 473                                       | 215                                            | 258                                        |                      |
| Cough                                       | 1,087 (70%)                               | 576 (69%)                                      | 511 (72%)                                  | 0.37                 |
| (Missing)                                   | 414                                       | 195                                            | 219                                        |                      |
| Shortness of Breath or Difficulty Breathing | 690 (44%)                                 | 408 (49%)                                      | 282 (39%)                                  | <0.001               |
| (Missing)                                   | 401                                       | 188                                            | 213                                        |                      |
| Loss of Taste                               | 264 (18%)                                 | 151 (19%)                                      | 113 (17%)                                  | 0.33                 |
| (Missing)                                   | 505                                       | 233                                            | 272                                        |                      |
| <b>Underlying Conditions</b>                |                                           |                                                |                                            |                      |
| Pregnant                                    | 69 (3.6%)                                 | 59 (6.0%)                                      | 10 (1.1%)                                  | <0.001               |
| (Missing)                                   | 66                                        | 42                                             | 24                                         |                      |
| Chronic Lung Disease                        | 387 (21%)                                 | 193 (20%)                                      | 194 (22%)                                  | 0.33                 |
| (Missing)                                   | 134                                       | 75                                             | 59                                         |                      |
| Hypertension                                | 874 (47%)                                 | 377 (39%)                                      | 497 (56%)                                  | <0.001               |
| (Missing)                                   | 95                                        | 50                                             | 45                                         |                      |
| Overweight                                  | 584 (32%)                                 | 315 (33%)                                      | 269 (32%)                                  | 0.50                 |
| (Missing)                                   | 150                                       | 70                                             | 80                                         |                      |
| Cardiovascular Disease                      | 534 (29%)                                 | 217 (23%)                                      | 317 (36%)                                  | <0.001               |
| (Missing)                                   | 126                                       | 65                                             | 61                                         |                      |
| Diabetes                                    | 426 (23%)                                 | 180 (19%)                                      | 246 (28%)                                  | <0.001               |
| (Missing)                                   | 101                                       | 53                                             | 48                                         |                      |

|                                                   |            |           |           |        |
|---------------------------------------------------|------------|-----------|-----------|--------|
| Renal Disease                                     | 316 (17%)  | 106 (11%) | 210 (24%) | <0.001 |
| (Missing)                                         | 132        | 69        | 63        |        |
| Liver Disease                                     | 83 (4.5%)  | 37 (3.8%) | 46 (5.2%) | 0.16   |
| (Missing)                                         | 107        | 59        | 48        |        |
| Autoimmune Disease                                | 101 (5.5%) | 42 (4.4%) | 59 (6.8%) | 0.03   |
| (Missing)                                         | 135        | 69        | 66        |        |
| Immunocompromised <sup>3</sup>                    | 269 (15%)  | 89 (9.3%) | 180 (21%) | <0.001 |
| (Missing)                                         | 137        | 69        | 68        |        |
| Systemic Immunosuppressive Therapy or Medications | 293 (16%)  | 117 (12%) | 176 (20%) | <0.001 |
| (Missing)                                         | 115        | 59        | 56        |        |

<sup>1</sup> n (%) or median (Interquartile Range [IQR])

<sup>2</sup> Pearson's Chi-squared test or Fisher's exact test for categorical variables and Wilcoxon rank-sum test for continuous variables

<sup>3</sup> Immunocompromised (e.g., HIV infection, active cancer, solid organ transplant, hematopoietic stem cell transplant)

586

587

**Table S2. Circulation of VOC/VOI in Georgia, USA as measured by available sequences on GISAID**

| VOC/VOI                                                                                        | Period variant circulated in GA <sup>1</sup> | Date range of sequences obtained from GISAID | Sequences available on GISAID | Total sequences available from May 2021 to May 2022 (%) |
|------------------------------------------------------------------------------------------------|----------------------------------------------|----------------------------------------------|-------------------------------|---------------------------------------------------------|
| <b>Alpha</b>                                                                                   | 12/10/2020-08/26/2021                        | 05/01/2021-08/26/2021                        | 1,361                         | 2.66                                                    |
| <b>Beta</b>                                                                                    | 02/01/2021-05/25/2021                        | 05/01/2021-05/25/2021                        | 16                            | 0.03                                                    |
| <b>Delta</b>                                                                                   | 4/29/2021-03/10/2022                         | 05/01/2021-03/10/2022                        | 28,320                        | 55.5                                                    |
| <b>Gamma</b>                                                                                   | 03/05/2021-09/24/2021                        | 05/01/2021-09/24/2021                        | 185                           | 0.36                                                    |
| <b>Lambda</b>                                                                                  | 02/07/2021-08/05/2021                        | 05/01/2021-08/05/2021                        | 18                            | 0.04                                                    |
| <b>Mu</b>                                                                                      | 04/23/2021-09/14/2021                        | 05/01/2021-09/14/2021                        | 142                           | 0.28                                                    |
| <b>Omicron</b>                                                                                 | 11/30/2021-4/18/2023                         | 11/30/2021-04/18/2023                        | 20,759                        | 40.6                                                    |
| <b>Total VOC/VOI</b>                                                                           |                                              |                                              | <b>50,801</b>                 | <b>99.46</b>                                            |
| <b>Total sequences available on GISAID from May 2021 to May 2022 from the state of Georgia</b> |                                              |                                              | <b>51,075</b>                 | <b>---</b>                                              |

<sup>1</sup>Period of circulation based on sequences available on GISAID including Emory Healthcare samples.

588

**Table S3. Unadjusted Multinomial Logistic Regression Models Testing the Association between Demographics, Underlying Health Conditions, and COVID-Related Characteristics with Disease Severity**

| Variable                                          | Moderate <sup>1</sup> |                     |                  | Severe <sup>1</sup> |                     |                  | Death <sup>1</sup> |                     |                  |
|---------------------------------------------------|-----------------------|---------------------|------------------|---------------------|---------------------|------------------|--------------------|---------------------|------------------|
|                                                   | OR <sup>2</sup>       | 95% CI <sup>2</sup> | p                | OR <sup>2</sup>     | 95% CI <sup>2</sup> | p                | OR <sup>2</sup>    | 95% CI <sup>2</sup> | p                |
| <b>Unadjusted Models</b>                          |                       |                     |                  |                     |                     |                  |                    |                     |                  |
| Age                                               | <b>1.04</b>           | <b>1.03, 1.05</b>   | <b>&lt;0.001</b> | <b>1.05</b>         | <b>1.04, 1.05</b>   | <b>&lt;0.001</b> | <b>1.07</b>        | <b>1.05, 1.09</b>   | <b>&lt;0.001</b> |
| Male <sup>3</sup>                                 | <b>1.40</b>           | <b>1.13, 1.74</b>   | <b>&lt;0.01</b>  | 1.30                | 0.95, 1.78          | 0.10             | 1.26               | 0.72, 2.22          | 0.40             |
| White <sup>4</sup>                                | 0.86                  | 0.67, 1.10          | 0.20             | 1.27                | 0.91, 1.77          | 0.20             | 1.04               | 0.57, 1.91          | 0.90             |
| Chronic Lung Disease                              | <b>2.07</b>           | <b>1.59, 2.68</b>   | <b>&lt;0.001</b> | <b>1.95</b>         | <b>1.35, 2.81</b>   | <b>&lt;0.001</b> | <b>2.65</b>        | <b>1.44, 4.86</b>   | <b>&lt;0.01</b>  |
| Hypertension                                      | <b>2.94</b>           | <b>2.35, 3.68</b>   | <b>&lt;0.001</b> | <b>4.19</b>         | <b>2.98, 5.90</b>   | <b>&lt;0.001</b> | <b>11.4</b>        | <b>5.09, 25.6</b>   | <b>&lt;0.001</b> |
| Overweight                                        | <b>1.45</b>           | <b>1.15, 1.83</b>   | <b>&lt;0.01</b>  | <b>1.58</b>         | <b>1.14, 2.19</b>   | <b>0.01</b>      | <b>2.02</b>        | <b>1.13, 3.61</b>   | <b>0.02</b>      |
| Cardiovascular Disease                            | <b>2.89</b>           | <b>2.28, 3.67</b>   | <b>&lt;0.001</b> | <b>3.46</b>         | <b>2.48, 4.81</b>   | <b>&lt;0.001</b> | <b>4.80</b>        | <b>2.70, 8.54</b>   | <b>&lt;0.001</b> |
| Diabetes                                          | <b>2.04</b>           | <b>1.58, 2.63</b>   | <b>&lt;0.001</b> | <b>3.21</b>         | <b>2.29, 4.50</b>   | <b>&lt;0.001</b> | <b>4.35</b>        | <b>2.43, 7.80</b>   | <b>&lt;0.001</b> |
| Renal Disease                                     | <b>3.88</b>           | <b>2.90, 5.19</b>   | <b>&lt;0.001</b> | <b>3.86</b>         | <b>2.62, 5.67</b>   | <b>&lt;0.001</b> | <b>9.86</b>        | <b>5.46, 17.8</b>   | <b>&lt;0.001</b> |
| Liver Disease                                     | 1.47                  | 0.87, 2.50          | 0.20             | <b>2.36</b>         | <b>1.25, 4.45</b>   | <b>&lt;0.01</b>  | <b>3.08</b>        | <b>1.16, 8.21</b>   | <b>0.02</b>      |
| Autoimmune Disease                                | <b>1.60</b>           | <b>1.01, 2.56</b>   | <b>0.046</b>     | <b>1.58</b>         | <b>0.82, 3.03</b>   | <b>0.20</b>      | <b>2.45</b>        | <b>0.93, 6.47</b>   | <b>0.07</b>      |
| Immunocompromised                                 | <b>2.65</b>           | <b>1.97, 3.58</b>   | <b>&lt;0.001</b> | <b>2.44</b>         | <b>1.61, 3.69</b>   | <b>&lt;0.001</b> | <b>3.69</b>        | <b>1.93, 7.09</b>   | <b>&lt;0.001</b> |
| Systemic Immunosuppressive Therapy/Meds.          | <b>3.49</b>           | <b>2.61, 4.67</b>   | <b>&lt;0.001</b> | <b>3.24</b>         | <b>2.18, 4.81</b>   | <b>&lt;0.001</b> | <b>3.48</b>        | <b>1.79, 6.78</b>   | <b>&lt;0.001</b> |
| <u>Vaccination Status</u>                         |                       |                     |                  |                     |                     |                  |                    |                     |                  |
| Unvaccinated                                      | Ref                   | —                   |                  | Ref                 | —                   |                  | Ref                | —                   |                  |
| Vaccinated <sup>5</sup>                           | <b>0.80</b>           | <b>0.64, 1.01</b>   | <b>0.07</b>      | 0.86                | 0.61, 1.21          | 0.40             | 1.00               | 0.54, 1.84          | >0.90            |
| Vaccinated & boosted <sup>5</sup>                 | <b>2.28</b>           | <b>1.52, 3.43</b>   | <b>&lt;0.001</b> | <b>3.24</b>         | <b>1.95, 5.40</b>   | <b>&lt;0.001</b> | <b>3.69</b>        | <b>1.58, 8.59</b>   | <b>&lt;0.01</b>  |
| <u>Days Since Most Recent Vaccination/Booster</u> |                       |                     |                  |                     |                     |                  |                    |                     |                  |
| Unvaccinated                                      | —                     | —                   |                  | —                   | —                   |                  | —                  | —                   |                  |
| Within past 90 Days <sup>5</sup>                  | 1.34                  | 0.86, 2.08          | 0.20             | 1.68                | 0.93, 3.03          | 0.09             | 2.81               | 1.17, 6.79          | 0.02             |
| 91 - 180 Days Ago <sup>5</sup>                    | 0.98                  | 0.74, 1.29          | 0.90             | 0.92                | 0.60, 1.40          | 0.70             | 1.14               | 0.55, 2.37          | 0.70             |
| 181 - 270 Days Ago <sup>5</sup>                   | 0.72                  | 0.51, 1.01          | 0.06             | 0.74                | 0.45, 1.24          | 0.30             | 0.71               | 0.27, 1.89          | 0.50             |
| More than 270 Days Ago <sup>5</sup>               | 1.18                  | 0.72, 1.94          | 0.50             | 2.49                | 1.43, 4.36          | <0.01            | 1.91               | 0.64, 5.72          | 0.20             |
| <u>Lineage</u>                                    |                       |                     |                  |                     |                     |                  |                    |                     |                  |
| Delta                                             | Ref                   | —                   |                  | Ref                 | —                   |                  | Ref                | —                   |                  |
| <b>Omicron<sup>6</sup></b>                        | <b>1.51</b>           | <b>1.09, 2.07</b>   | <b>0.01</b>      | <b>2.25</b>         | <b>1.46, 3.48</b>   | <b>&lt;0.001</b> | <b>4.55</b>        | <b>2.25, 9.20</b>   | <b>&lt;0.001</b> |

<sup>1</sup> "Mild" is the Reference Category

<sup>2</sup> OR = Odds Ratio, CI = Confidence Interval, Ref = Reference Level

<sup>3</sup> Compared to "Female"

<sup>4</sup> Compared to "Black"

<sup>5</sup> Compared to "Unvaccinated individuals"

<sup>6</sup> Compared to "Delta"

590 SUPPLEMENTARY FIGURES

591

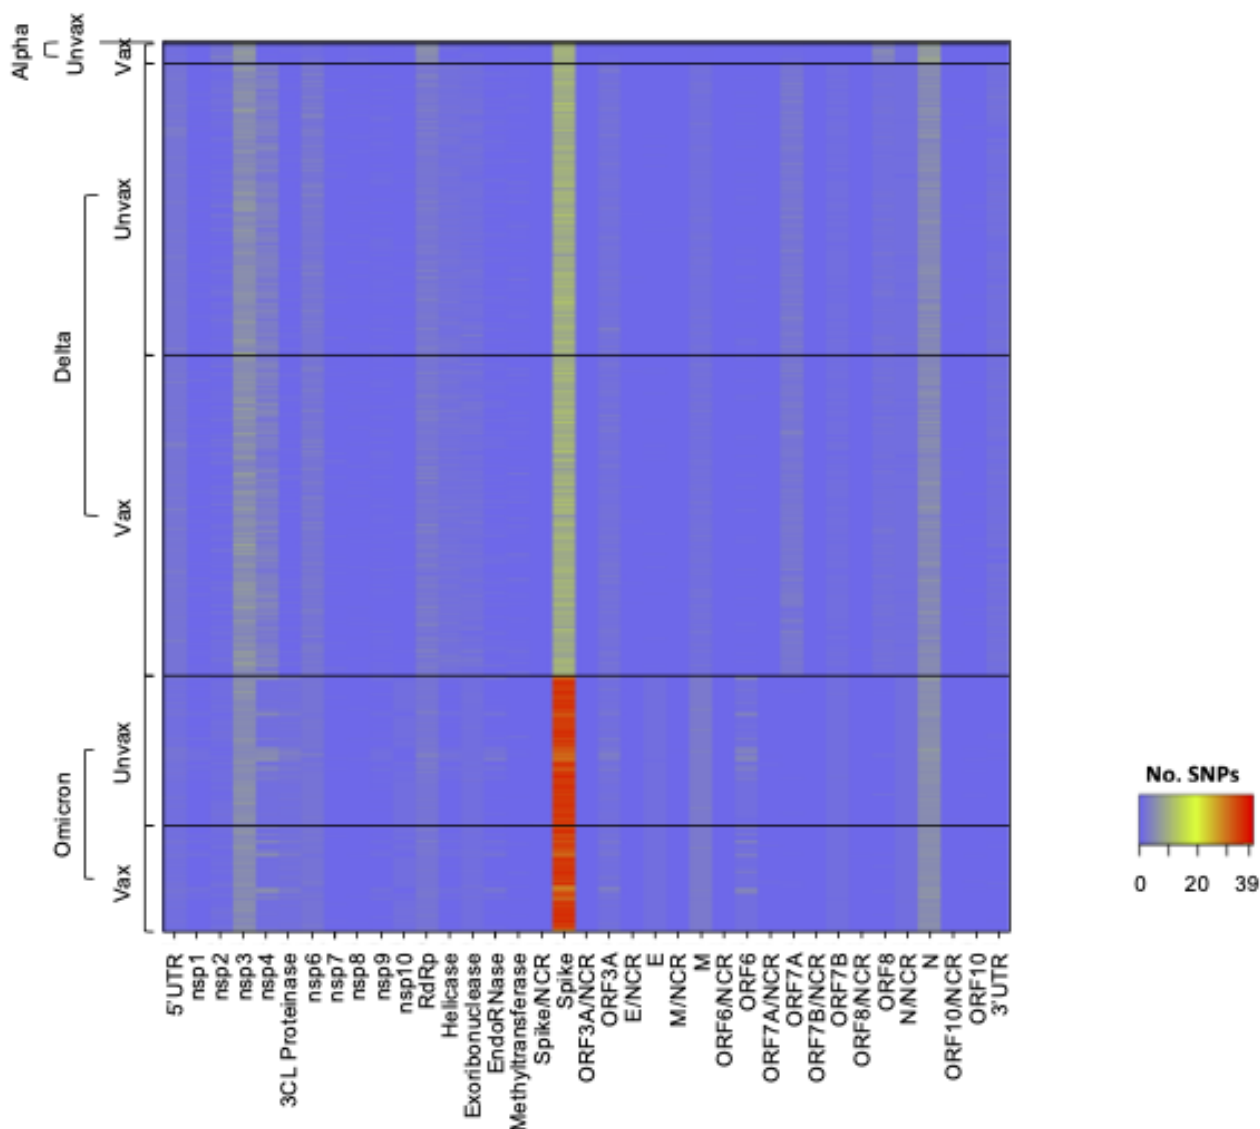

592  
593 **Figure S1. Mutations across SARS-CoV-2 genes.** Alpha, delta, and omicron sequences were  
594 aligned to Wuhan/Hu-1/2019. For each variant, samples from vaccinated (“vax”) and  
595 unvaccinated (“unvax”) individuals are labeled. Each square in the heatmap represents the  
596 number of single nucleotide polymorphisms (SNPs) in each gene, labeled on the x-axis. Each  
597 row represents one sample.

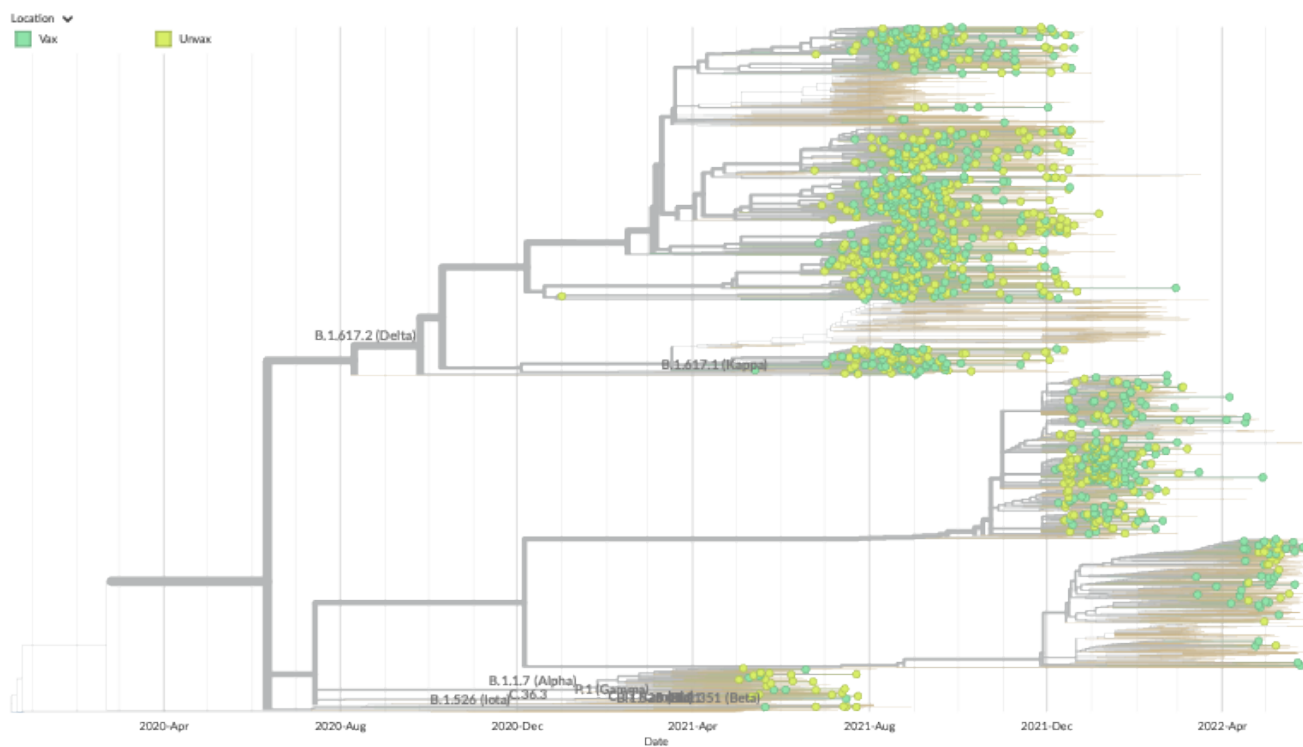

598

599 **Figure S2. Phylogenetic analysis does not reveal differences in SARS-CoV-2 sequences**  
600 **from vaccinated and unvaccinated individuals.** Maximum likelihood tree containing  
601 sequences from vaccinated (green) and unvaccinated (yellow) individuals in the context of 2000  
602 global sequences from GISAID (orange) selected by a custom Nextstrain subsampling scheme  
603 and rooted to NC\_045512.
